# Supplementary material for: Is Less Sedentary Behavior, More Physical Activity, or Higher Fitness Associated with Sleep Quality? A Cross-Sectional Study in Singapore
Source: MDPI journal article supplement (doi:10.3390/ijerph17041337), 2020-02-19
Supplement: s1 [file s1]

**Table S1.** Descriptive Statistics of Key Outcome Variables (N = 757).

|                                                      | Total         | Pittsburgh sleep quality index (PSQI) <sup>a</sup> |                    | P-value |
|------------------------------------------------------|---------------|----------------------------------------------------|--------------------|---------|
|                                                      |               | Good sleep quality                                 | Poor sleep quality |         |
| <b>Accelerometer data</b>                            |               |                                                    |                    |         |
| Average wear days                                    | 6.77 (0.64)   | 6.78 (0.64)                                        | 6.74 (0.63)        | .581    |
| Average wear time (hrs/day)                          | 14.23 (1.44)  | 14.23 (1.43)                                       | 14.19 (1.52)       | .787    |
| MVPA (min/day) <sup>b</sup>                          | 45.79 (21.11) | 46.19 (21.1)                                       | 43.16 (21.1)       | .182    |
| Lower (1 <sup>st</sup> and 2 <sup>nd</sup> tertiles) | -             | 433 (65.9%)                                        | 72 (72.0%)         |         |
| Higher (3 <sup>rd</sup> tertile)                     | -             | 224 (34.1%)                                        | 28 (28.0%)         |         |
| SB (hrs/day) <sup>c</sup>                            | 7.86 (1.25)   | 7.84 (1.25)                                        | 8.04 (1.22)        | .141    |
| Lower (1 <sup>st</sup> and 2 <sup>nd</sup> tertiles) | -             | 440 (67.0%)                                        | 64 (64.0%)         |         |
| Higher (3 <sup>rd</sup> tertile)                     | -             | 217 (33.0%)                                        | 33 (33.0%)         |         |
| PSQI components <sup>d</sup>                         |               |                                                    |                    |         |
| Duration of sleep                                    | 0.65 (0.76)   | 0.52 (0.65)                                        | 1.48 (0.9)         | <.001   |
| Sleep disturbance                                    | 0.97 (0.48)   | 0.91 (0.45)                                        | 1.37 (0.51)        | <.001   |
| Sleep latency                                        | 0.77 (0.84)   | 0.61 (0.71)                                        | 1.84 (0.9)         | <.001   |
| Sleepiness                                           | 0.73 (0.67)   | 0.63 (0.61)                                        | 1.37 (0.72)        | <.001   |
| Sleep efficiency                                     | 0.02 (0.22)   | 0 (0.04)                                           | 0.12 (0.59)        | <.001   |
| Sleep quality                                        | 0.13 (0.36)   | 0.05 (0.22)                                        | 0.62 (0.6)         | <.001   |
| Medications to sleep                                 | 0.02 (0.17)   | 0 (0.04)                                           | 0.14 (0.43)        | <.001   |
| Total PSQI scores                                    | 3.29 (1.92)   | 2.73 (1.28)                                        | 6.94 (1.34)        | <.001   |
| Cardiorespiratory fitness (CRF)                      |               |                                                    |                    |         |
| MaxVO <sub>2</sub> <sup>e</sup>                      | 35.39 (4.56)  | 35.64 (4.5)                                        | 33.78 (4.68)       | <.001   |
| Lower (1 <sup>st</sup> and 2 <sup>nd</sup> tertiles) | -             | 424 (64.5%)                                        | 80 (80.0%)         |         |
| Higher (3 <sup>rd</sup> tertile)                     | -             | 233 (35.5%)                                        | 20 (20.0%)         |         |

MVPA = moderate-to-vigorous intensity physical activity. SB= sedentary behavior. Values are presented as mean and standard deviation unless otherwise described. LM represents the low-to-middle (1<sup>st</sup> and 2<sup>nd</sup> tertile) group. MaxVO<sub>2</sub> represents the estimated CRF. ST represents the sedentary time. <sup>a</sup> the categorization of participants into good and poor sleep quality was based on total scores of the PSQI (i.e., ≤5 and >5 for good and poor sleep quality, respectively). <sup>b</sup> The tertile groups of MVPA (min/day) were created based on cut-points of <35.65, <52.12, and ≥52.12 min/day for the 1<sup>st</sup>, 2<sup>nd</sup>, and 3<sup>rd</sup> tertiles. <sup>c</sup> The tertile groups of ST (hrs/day) were created based on cut-points of <7.50, <8.50, and ≥8.50 hrs/day for the 1<sup>st</sup>, 2<sup>nd</sup>, and 3<sup>rd</sup> tertiles. <sup>d</sup> The score range of PSQI components was from 0 (better) to 3 (worse) and total PSQI scores ranged from 0 (better) to 21 (worse). <sup>e</sup> The tertile groups of CRF were created based on cut-points of <33.30, <37.70, and ≥37.70 ml/kg/min for the 1<sup>st</sup>, 2<sup>nd</sup>, and 3<sup>rd</sup> tertiles.

**Table S2.** Correlations Between SB, MVPA and CRF.

| Pair of variables <sup>a</sup>             | <i>r</i> (95% CI)    |
|--------------------------------------------|----------------------|
| MVPA (min/day) & SB (hrs/day)              | -0.30 (-0.36, -0.23) |
| MVPA (min/day) & CRF (MaxVO <sub>2</sub> ) | 0.27 (0.20, 0.33)    |
| SB (hrs/day) & CRF (MaxVO <sub>2</sub> )   | -0.04 (-0.11, 0.03)  |

MVPA = moderate-to-vigorous intensity physical activity. SB = sedentary activity. CRF = estimated cardiorespiratory fitness. <sup>a</sup> MVPA and SB minutes were least-square adjusted for accelerometer wear time.
